# Supplementary material
Source: publisher site journal article supplement (https://www.dovepress.com/article/556592)
Supplement: Supplementary file 1 [file 556592%20supplymentary.docx]

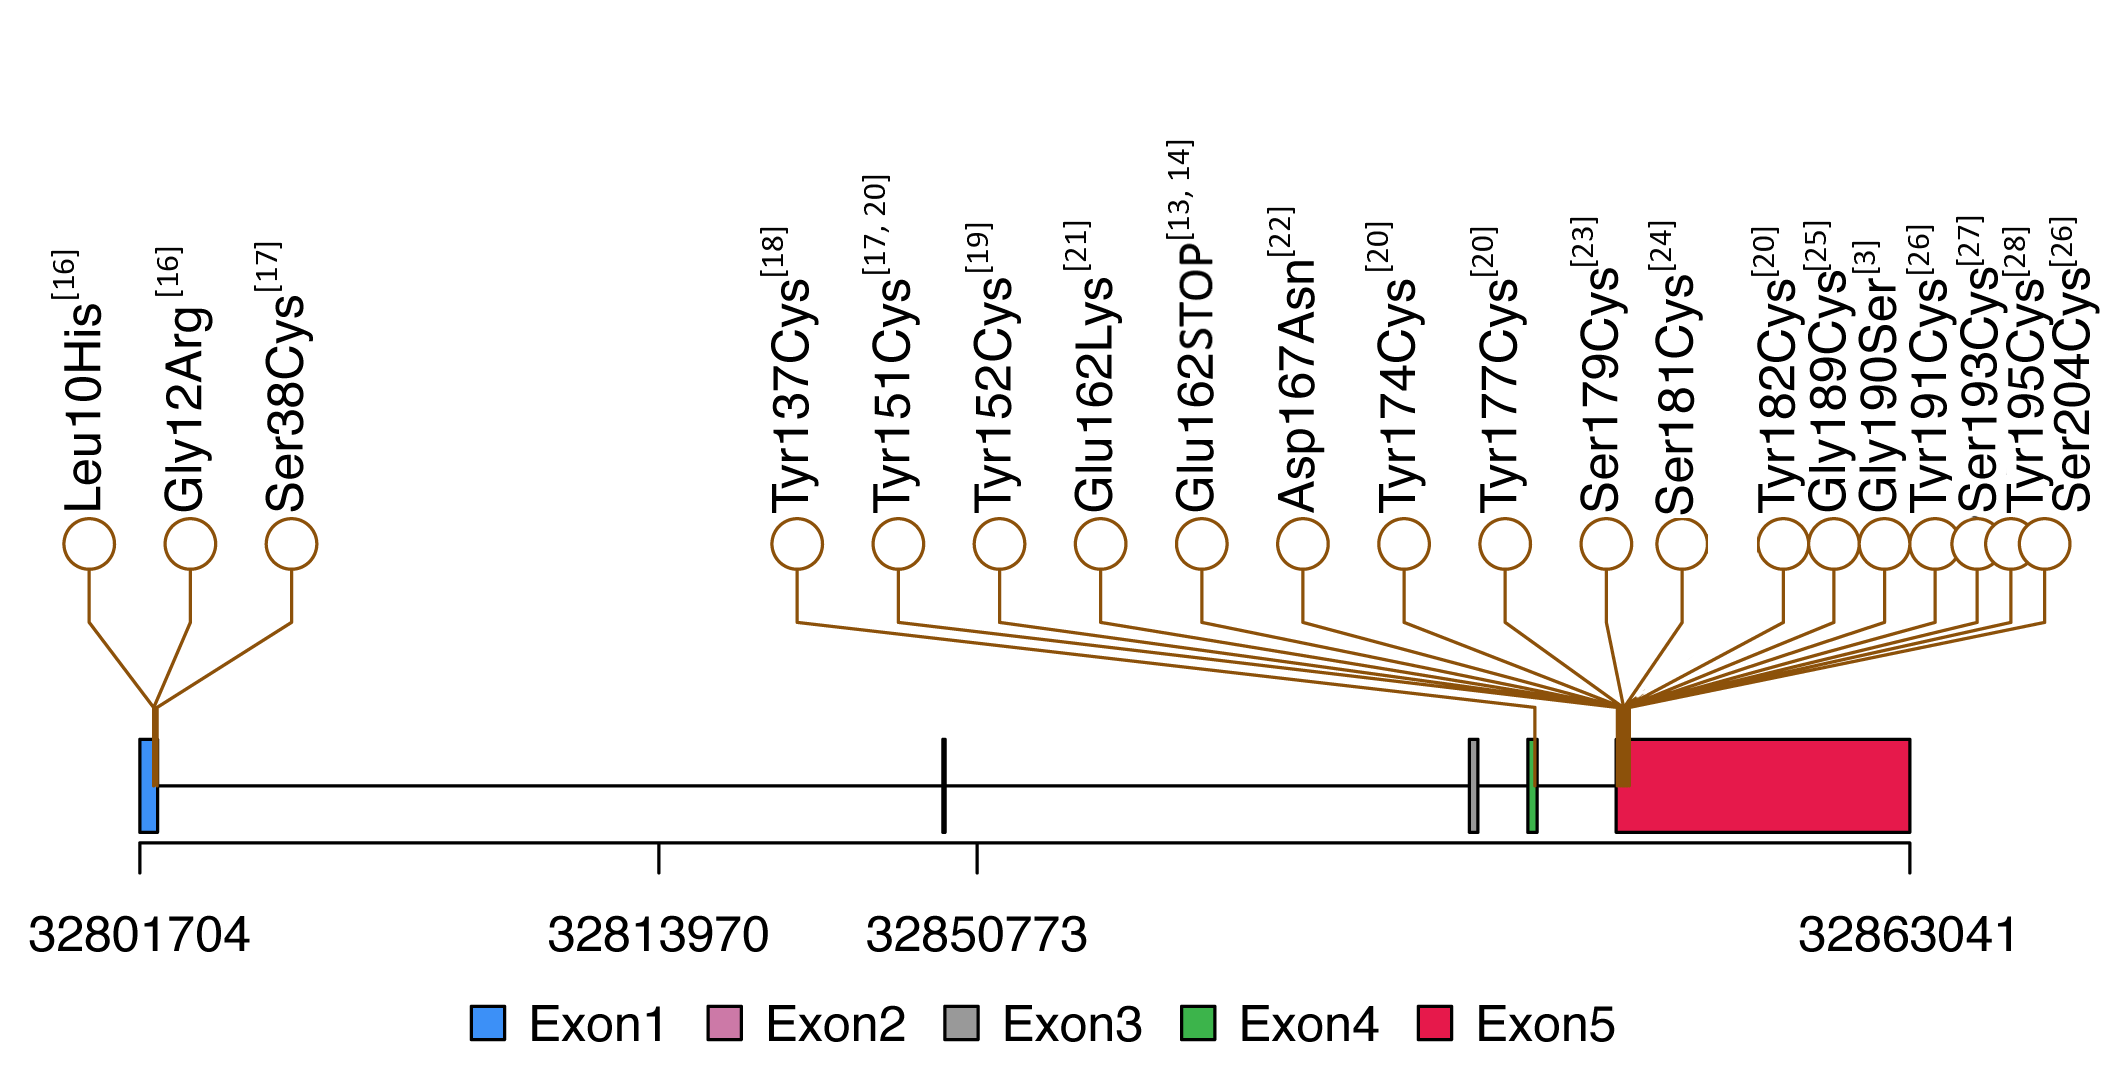


**Figure S1** Pathogenic TIMP3 Variants in Sorsby Fundus Dystrophy


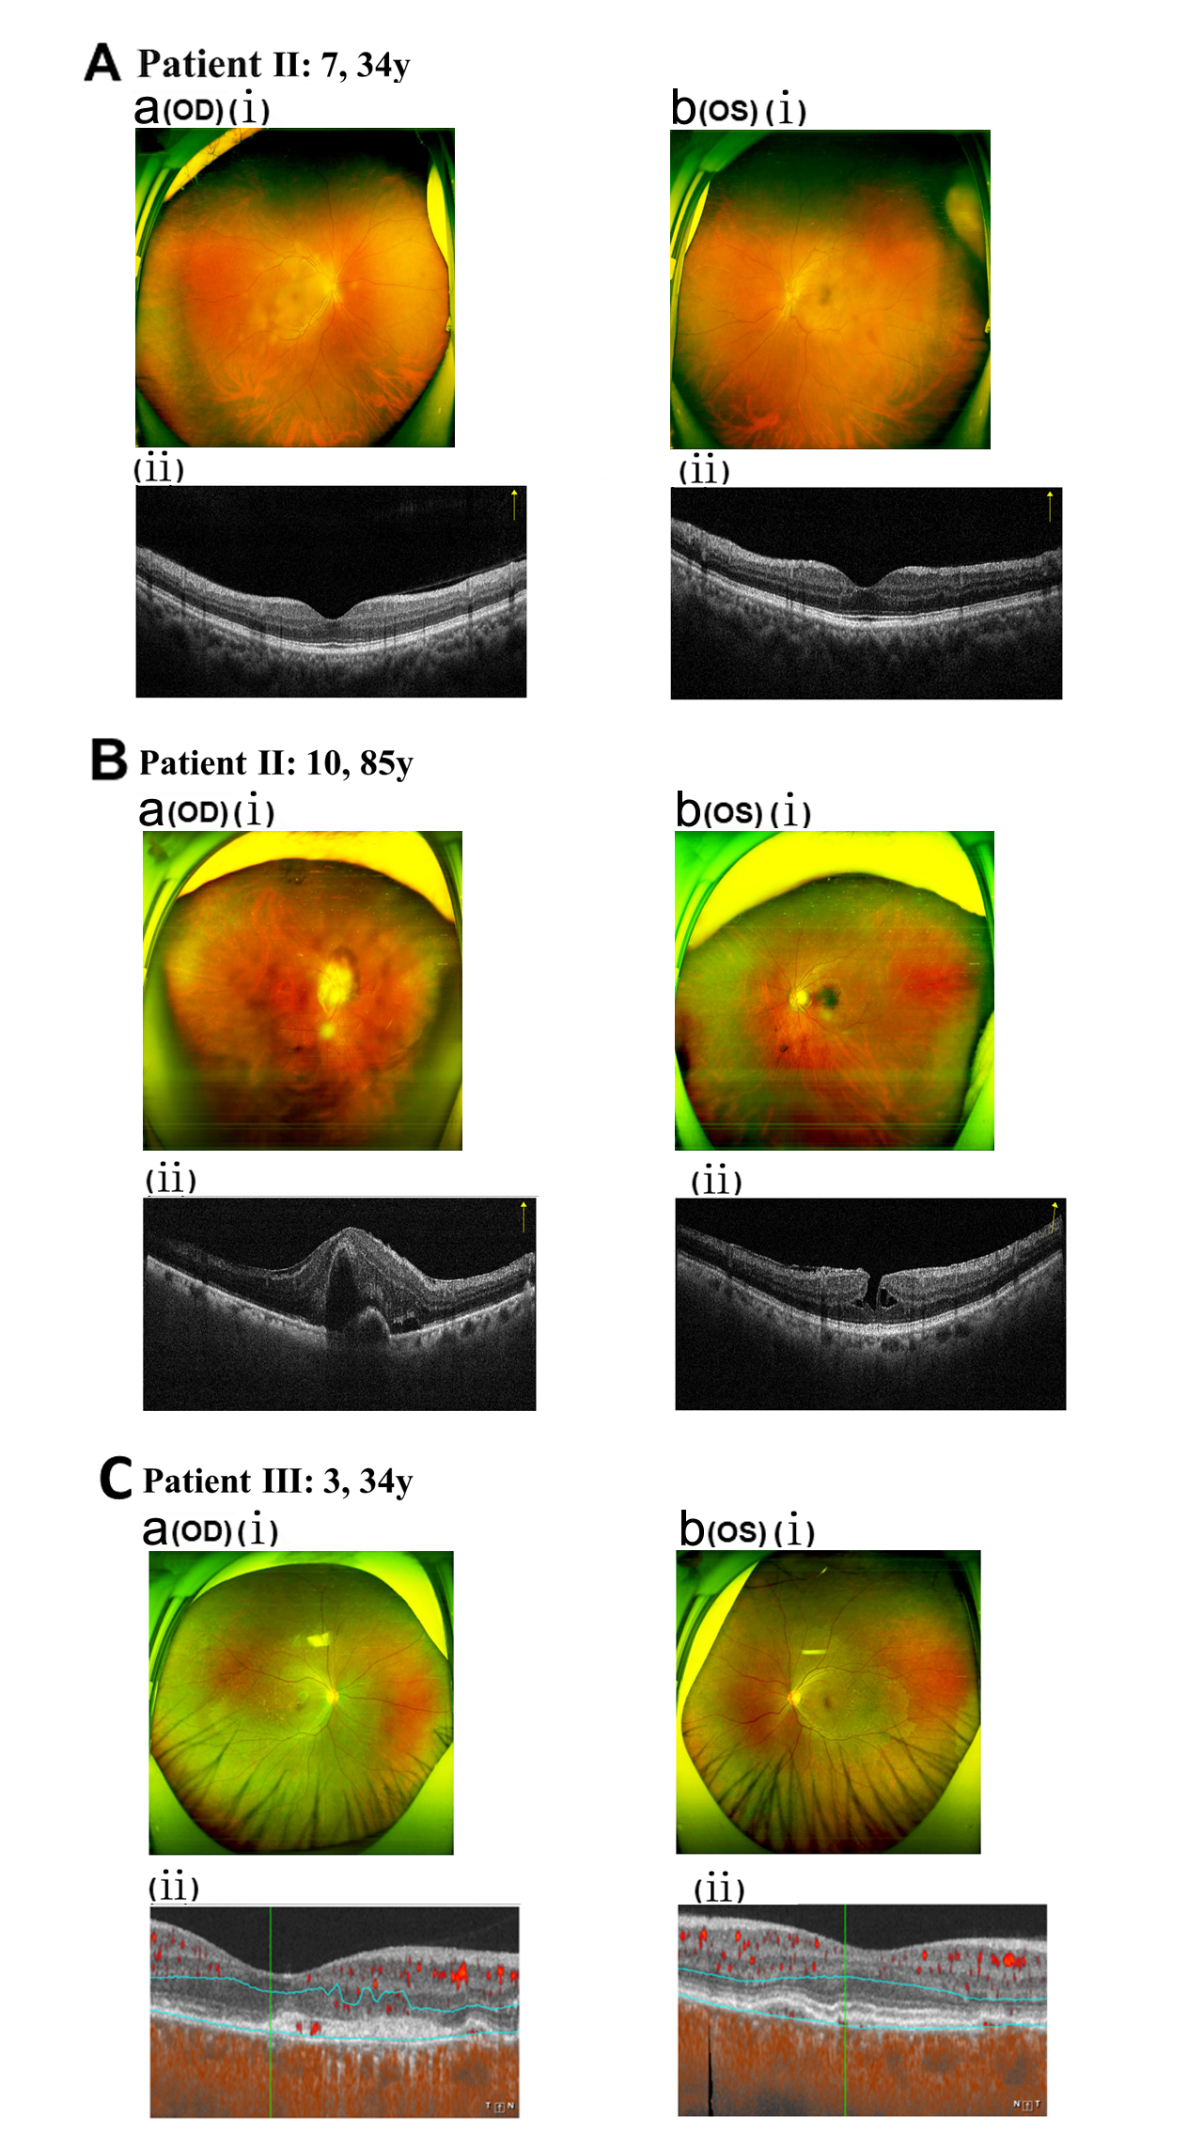


**Figure S2** Fundus, and SD-OCT findings of the other family members. **(a)** The right eye (OD). **(b)** The left eye (OS). **(A)** Patient II:7. **(A. a.ⅰ) and (A. b.ⅰ)** Fundus photography showed extensive retinal hemorrhage and edema. **(A. a.ⅱ) and (A. b.ⅱ)** SD-OCT showed no obvious abnormity. **(B)** Patient II:10. **(B. a.ⅰ) and (B. b.ⅰ)** Fundus photography showed opacification due to refractile mesenchymal tissue, myopic conus on the optic disk in right eye, and hemorrhage in the posterior polar of macular area in left eye. **(B. a.ⅱ) and (B. b.ⅱ)** SD-OCT presented epiretinal membrane, subretinal fluid and pigment epithelial detachment in right eye, and epiretinal membrane and a lamellar hole in left eye. There are RPE abnormalities bilaterally. **(C)** Patient III:3. **(C. a.ⅰ) and (C. b.ⅰ)** Fundus photography showed a small amount of yellow white deposit in the macular area of both eyes. **(C. a.ⅰ) and (C. b.ⅰ)** Angio OCT presented abnormal blood flow signals in the outer layer of binoculus, choroidal neovascularization, and sorsby macular dystrophy.


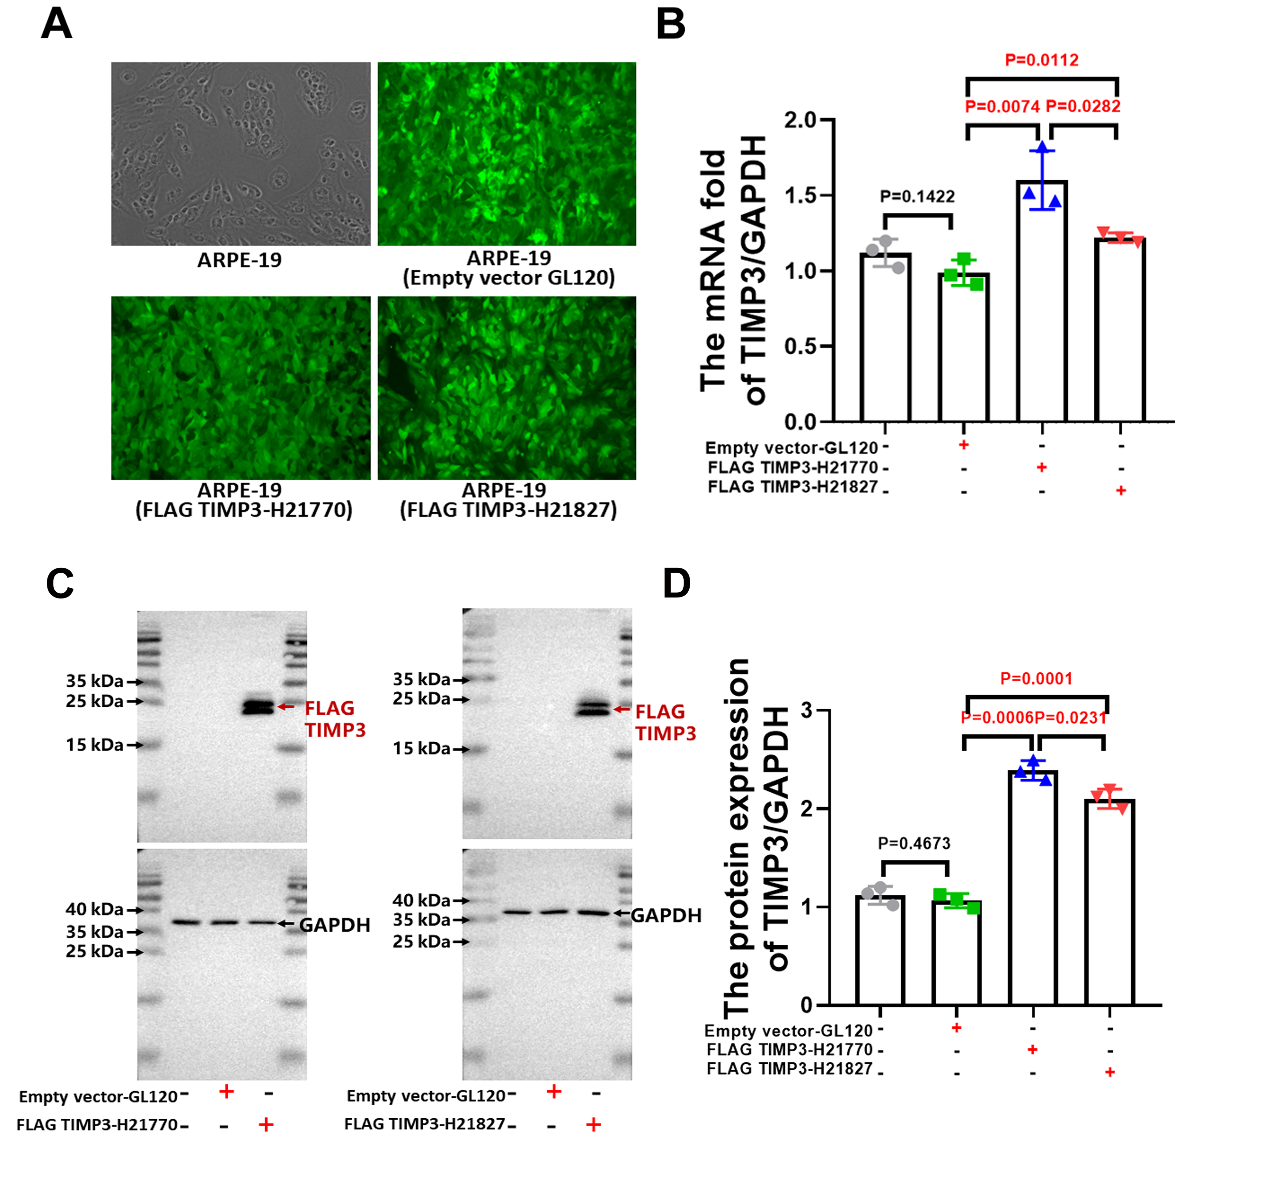


**Figure S3** The cell lines with stable expression of the empty vector (GL120), wild-type (FLAG TIMP3-H21770) and the mutant TIMP3 (FLAG TIMP3-H21827) vectors was established, respectively. (A) Morph and expression of GFP of labeled ARPE-19 were observed with invert phase-contrast light microscope and fluorescence microscope respectively. (B) Evaluation of transfection efficiency by RT-PCR. TIMP3 expression was significantly higher (3.27± 0.40-fold) in the WT group and the MT group than it was in the empty vector control group. (C, D) Evaluation of transfection efficiency by western blot, the WT group and the MT group significantly increased protein level (0.23 ±0.09-fold) compared with the empty vector control group. n=3/group. "n" denotes biological replicates, defined as independently assayed aliquots derived from the same lentiviral infection and differentiation batch.

**Table S1 The primers used in Real-time PCR**

|  | The forward primer (5’-3’) | The reverse primer (5’-3’) |
| --- | --- | --- |
| GAPDH | GGAGCGAGATCCCTCCAAAAT | GGCTGTTGTCATACTTCTCATGG |
| TIMP3 | AACAGAGAGGATTTCGTTTCCG | TTTGACCTGAGGGTAAGACTTCT |
